# Supplementary material for: Temperature dependent local structure coherence of surface-modified BaTiO3 nanocubes
Source: Royal Society of Chemistry journal article supplement (doi:10.1039/d2tc00477a), 2022-01-01
Supplement: d2tc00477a1.pdf [file d2tc00477a1.pdf]

# Supplementary Information:

## Temperature dependent local structure coherence of surface-modified BaTiO<sub>3</sub> nanocubes

Bo Jiang,<sup>†</sup> Changhao Zhao,<sup>‡,¶</sup> Peter C. Metz,<sup>†</sup> Palani Raja Jothi,<sup>§</sup> Kavey  
Benard,<sup>||</sup> Linda Reven,<sup>⊥</sup> Michael Lindner-D'Addario,<sup>⊥</sup> Jacob L. Jones,<sup>¶</sup> Gabriel  
Caruntu,<sup>#,||</sup> and Katharine Page<sup>\*,§,†</sup>

<sup>†</sup>*Neutron Scattering Division, Oak Ridge National Laboratory, Oak Ridge, Tennessee,  
37831, United States*

<sup>‡</sup>*Department of Materials and Earth Sciences, Technical University of Darmstadt, 64287  
Darmstadt, Germany*

<sup>¶</sup>*Department of Materials Science and Engineering, North Carolina State University,  
Raleigh, North Carolina 27695, United States*

<sup>§</sup>*Department of Materials Science and Engineering and Institute for Advanced Materials  
and Manufacturing, University of Tennessee, Knoxville, TN 37996, United States*

<sup>||</sup>*Department of Chemistry and Biochemistry, Central Michigan University, Mountain  
Pleasant, MI, 48859, United States*

<sup>⊥</sup>*Department of Chemistry, Centre québécois sur les matériaux fonctionnels/Quebec Centre  
for Advanced Materials (CQMF/QCAM), McGill University, Montreal, QC H3A 0C5,  
Canada*

<sup>#</sup>*Department of Electrical Engineering and Computer Science and MANSID Research  
Center, 'Stefan Cel Mare' University, 13, Universitatii St. Suceava, 720229, Romania*

E-mail: kpage10@utk.edu

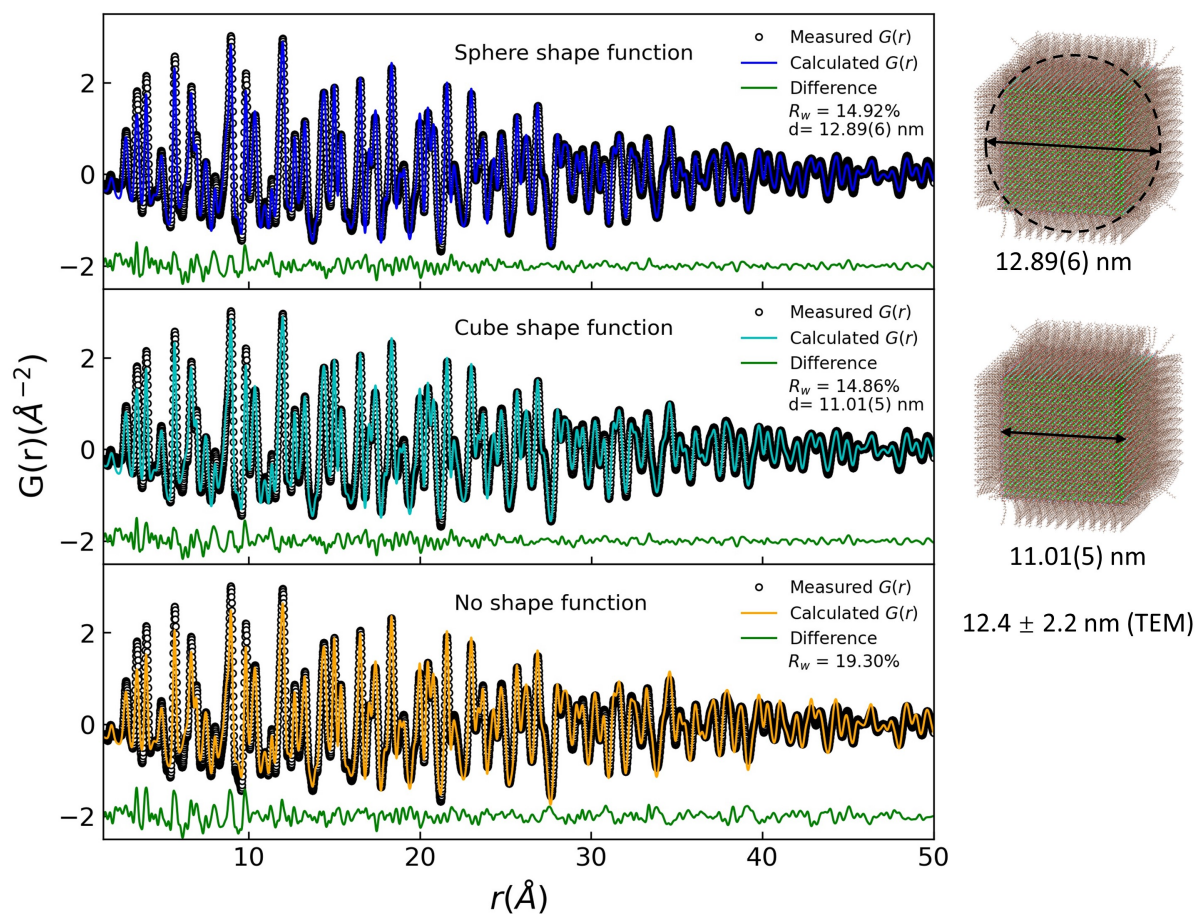

Figure S1: X-ray PDF fitting patterns of BTnc@OA for  $\sim 12$  nm nanocubes using a sphere shape function (top), cube shape function (middle) and no shape function (bottom). An improved fit residual and physically relevant coherent particle edge length were obtained by using the cube shape function (the obtained edge length of 11.01(5) nm is within range of the average TEM edge length of  $12.4 \pm 2.2$  nm).

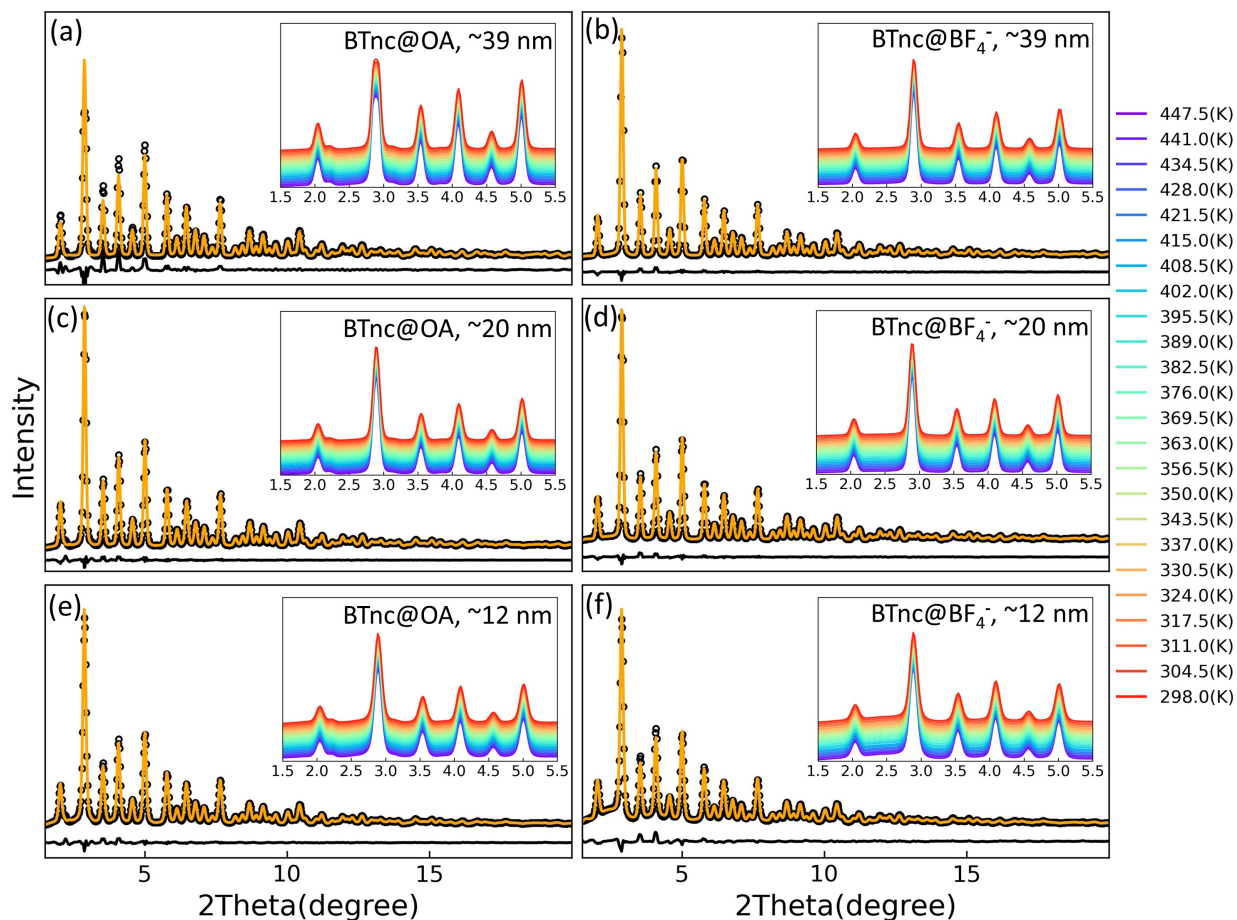

Figure S2: Rietveld refinements of synchrotron X-ray diffraction data of  $\text{BaTiO}_3$  nanocubes to tetragonal  $P4mm$  models, inserts show the temperature-dependent patterns from 300 K (Purple) to 440 K (Red). A mismatch in low  $2\theta$  peak intensities is noted in the Rietveld refinement result of the  $\sim 39$  nm BTnc@OA data in Figure S2(a), likely due to detector overexposure for the first several measurements in the series.

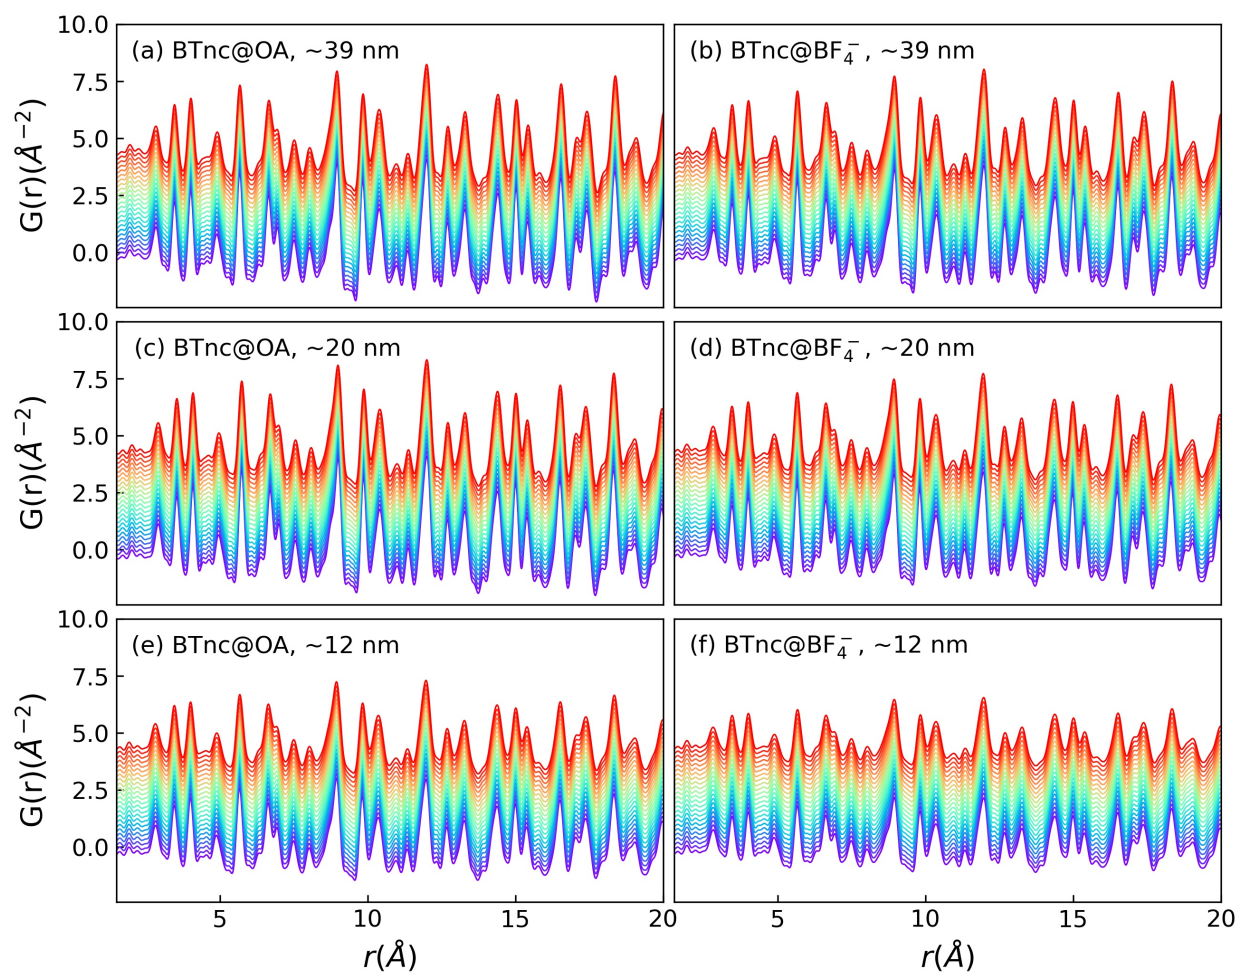

Figure S3: Synchrotron X-ray PDF patterns of BaTiO<sub>3</sub> nanocubes from 300 K (Purple) to 440 K (Red).

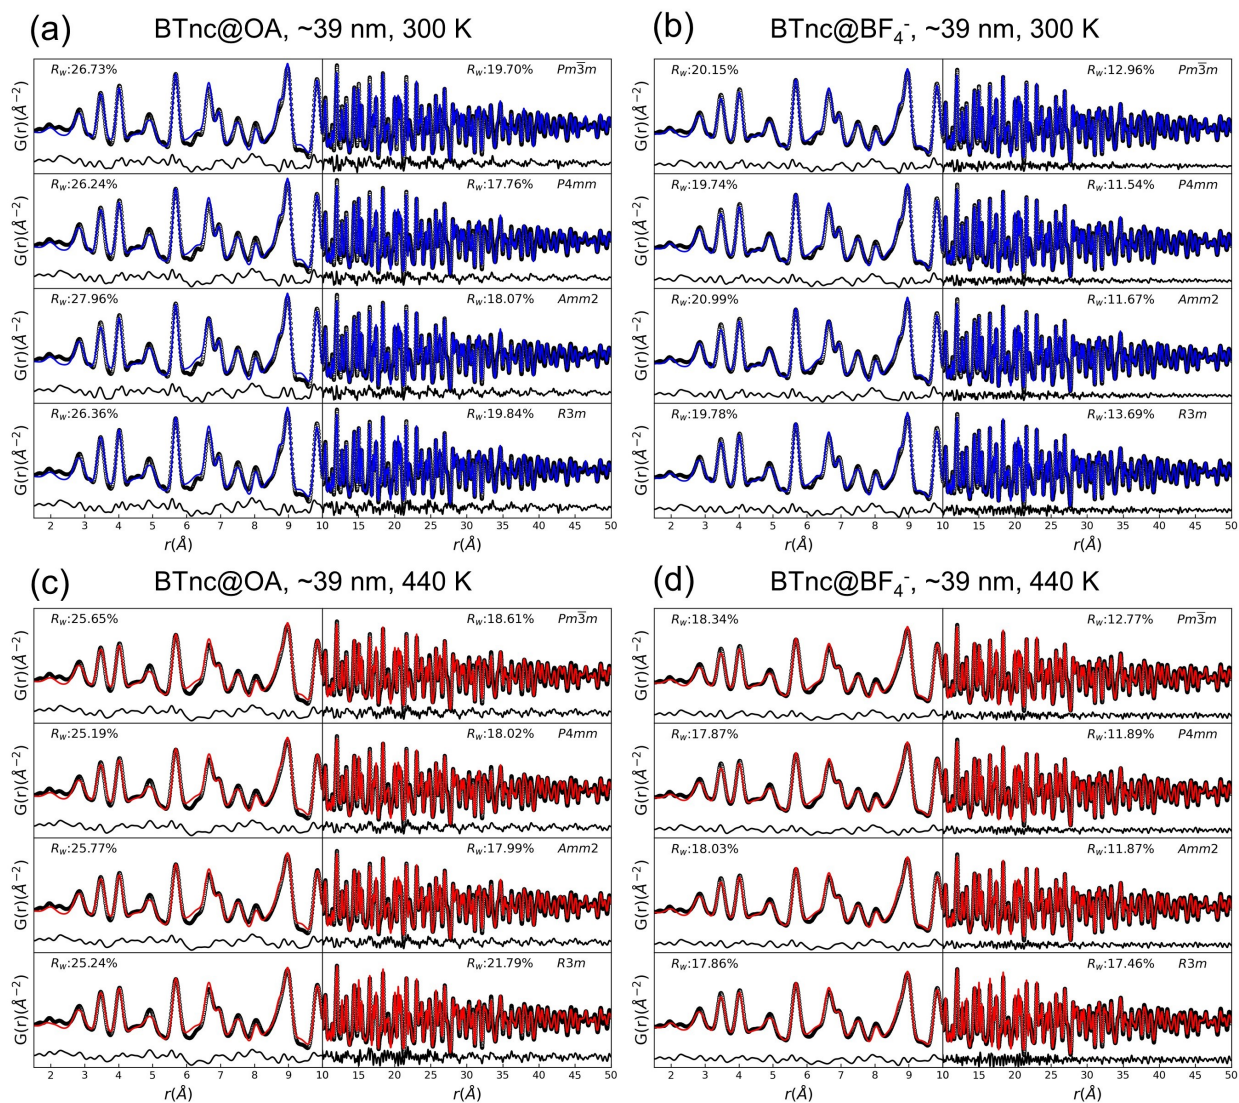

Figure S4: PDF refinements of synchrotron X-ray data using centrosymmetric cubic  $Pm\bar{3}m$ , and non-centrosymmetric (tetragonal  $P4mm$ , orthorhombic  $Amm2$  and rhombohedra  $R3m$ ) at (a, b) 300 K and (c, d) 440 K for BaTiO<sub>3</sub> ~39 nm nanocubes with OA and BF<sub>4</sub> ligands capped.

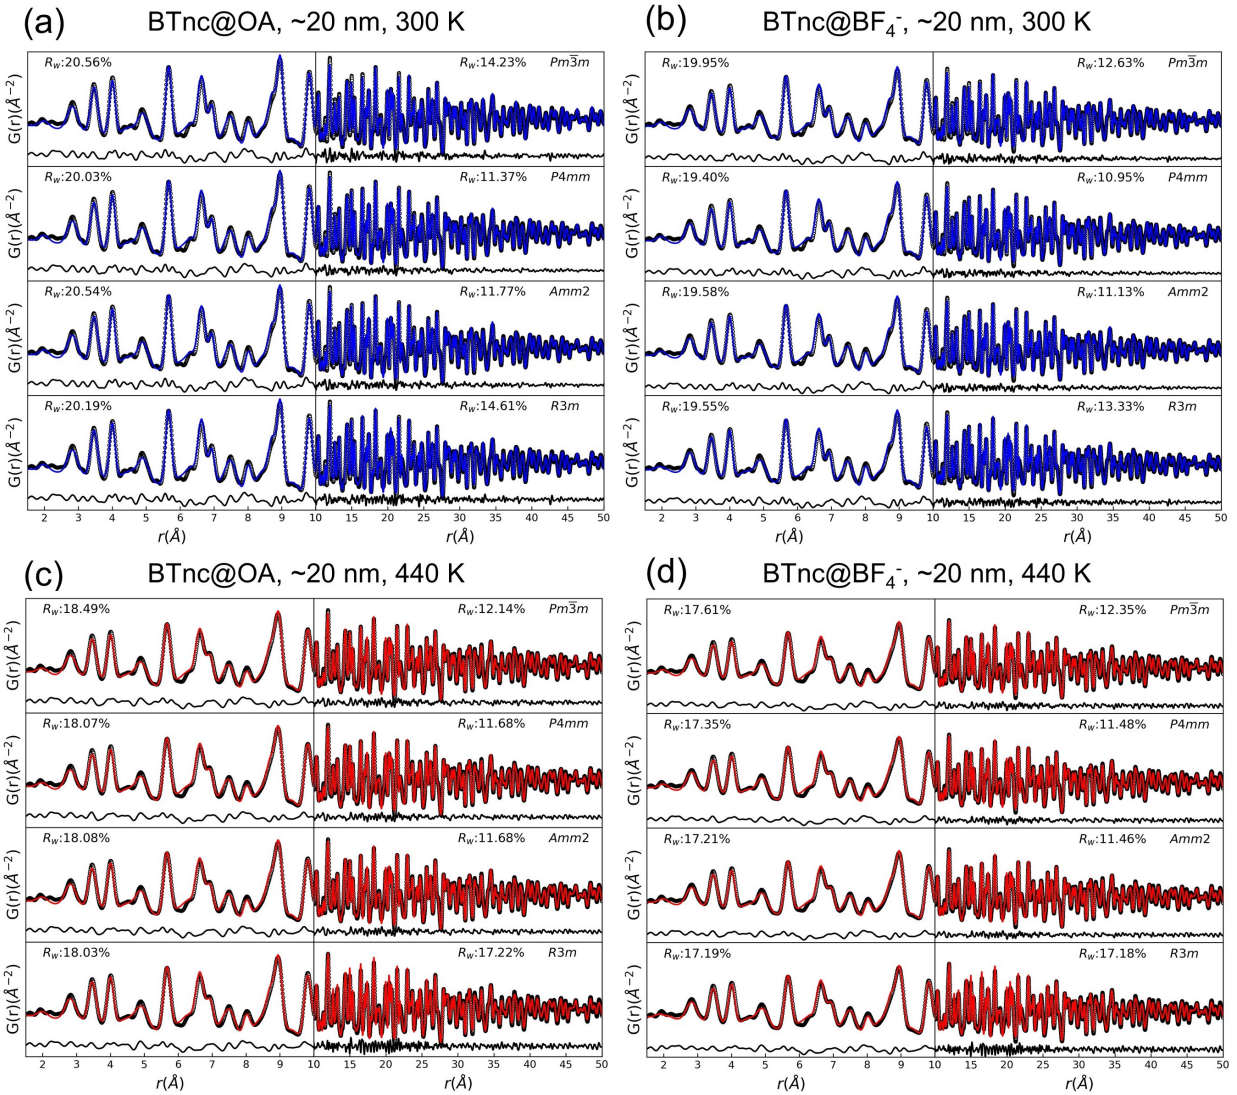

Figure S5: PDF refinements of synchrotron X-ray data using centrosymmetric cubic  $Pm\bar{3}m$ , and non-centrosymmetric (tetragonal  $P4mm$ , orthorhombic  $Amm2$  and rhombohedra  $R3m$ ) at (a, b) 300 K and (c, d) 440 K for BaTiO<sub>3</sub> ~20 nm nanocubes with OA and BF<sub>4</sub> ligands capped.

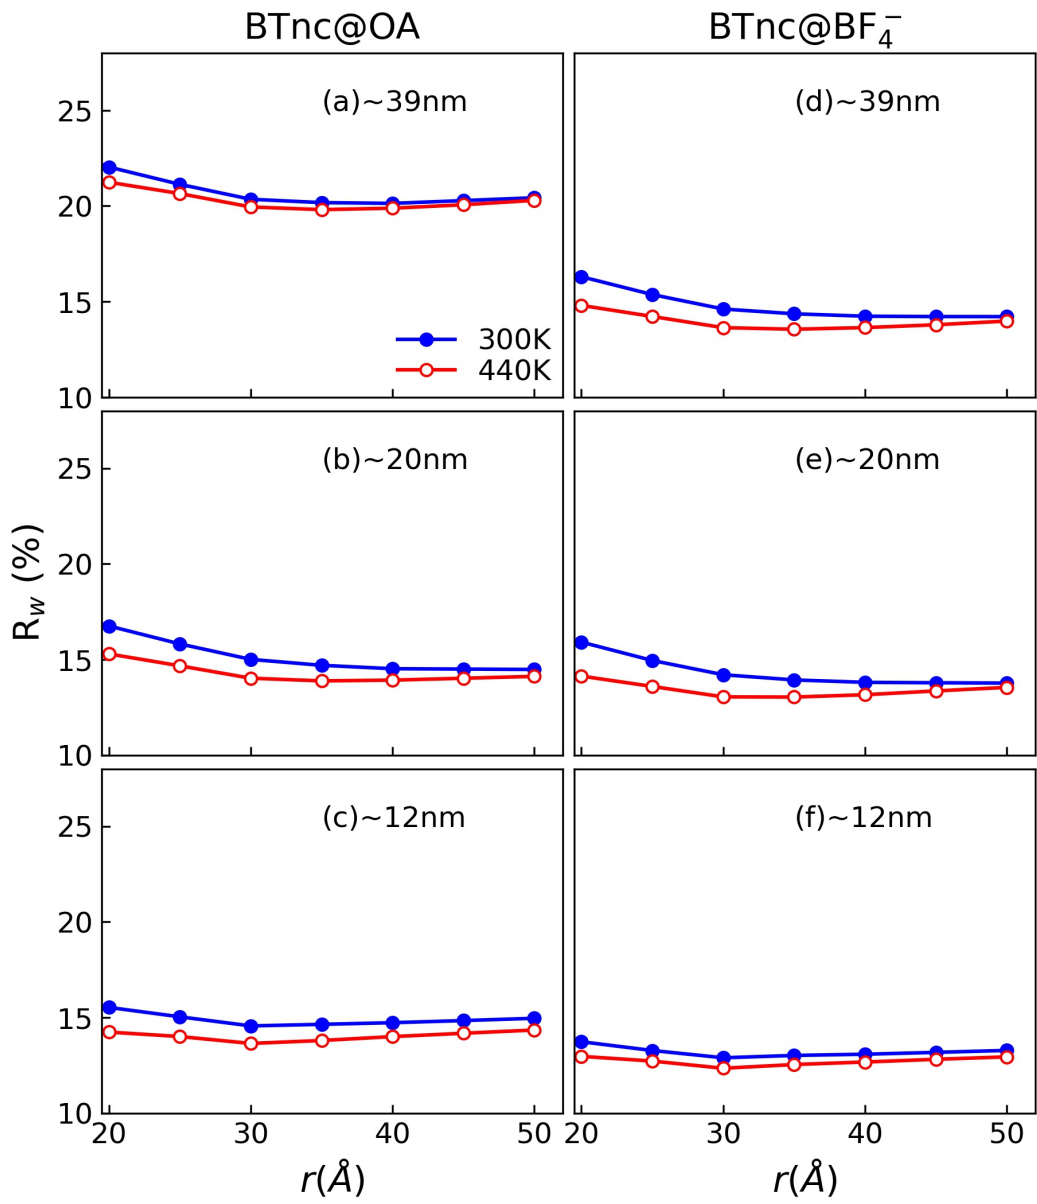

Figure S6: Goodness of fit ( $R_w$ ) resulting from PDF refinements using non-centrosymmetric tetragonal  $P4mm$  model with varying  $r_{max}$  range from 20 Å to 50 Å. Blue symbols indicate 300 K data and red symbols indicate 440 K data.

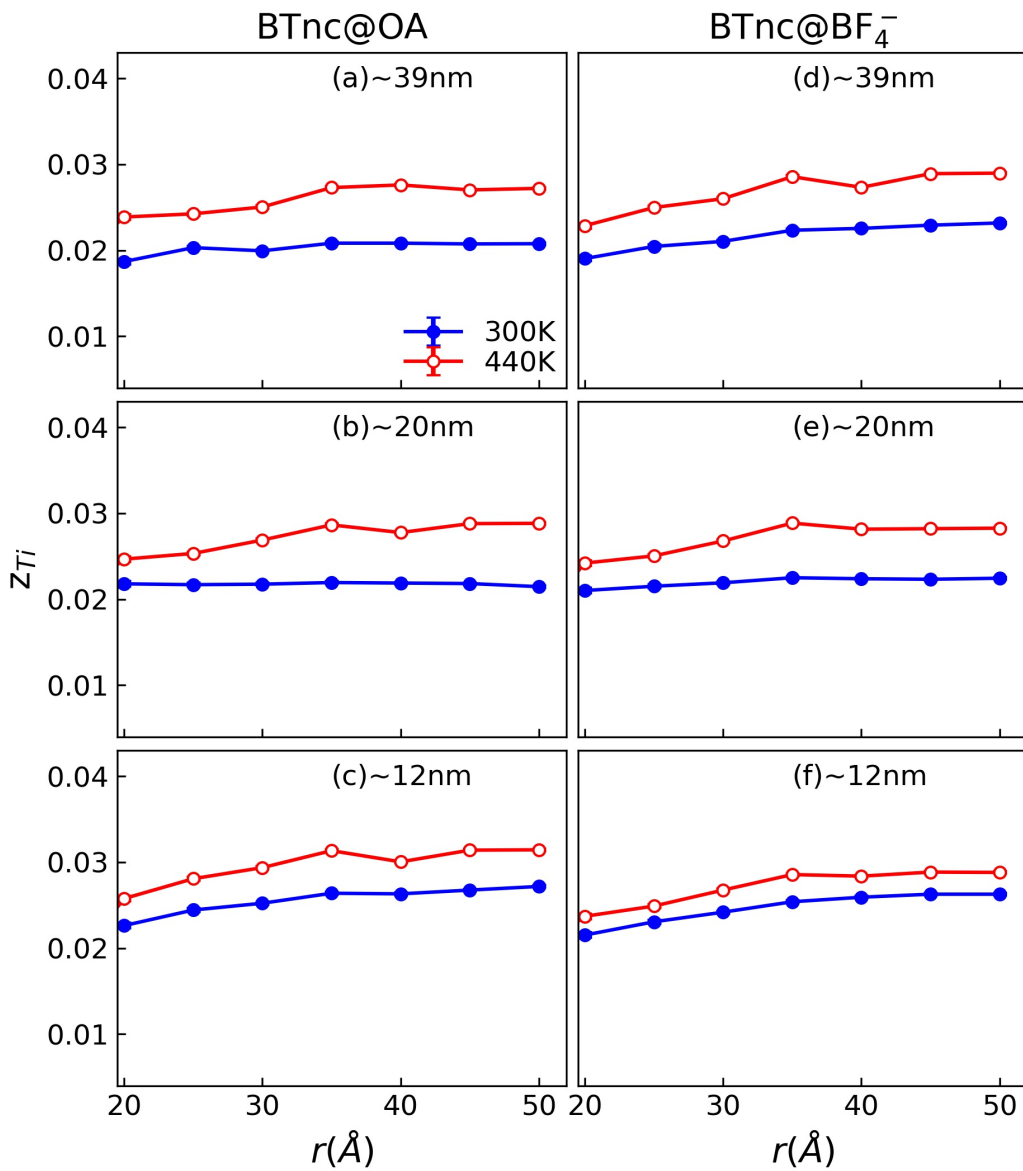

Figure S7: Ti off-centering ( $z_{Ti}$ ) parameter resulting from PDF refinements using non-centrosymmetric tetragonal  $P4mm$  model with varying  $r_{max}$  range from 20 Å to 50 Å. Blue symbols indicate 300 K data and red symbols indicate 440 K data.



Table S1: Goodness of fit ( $R_w$ ) of PDF refinements of synchrotron X-ray data over 1.5-10 Å and 10-50 Å ranges using centrosymmetric cubic  $Pm\bar{3}m$ , and non-centrosymmetric (tetragonal  $P4mm$ , orthorhombic  $Amm2$  and rhombohedra  $R3m$ ) space groups at 300 K and 440 K. The orthorhombic  $Amm2$  model was employed with oxygen position fixed to make the number of refined parameters close to that of the  $P4mm$  model. The lowest  $R_w$  values resulting among the four applied models are highlighted in bold text for each specific temperature and range.

|       | Space group  | BTnc@OA      |              |              |              | BTnc@BF <sub>4</sub> <sup>-</sup> |              |              |              |
|-------|--------------|--------------|--------------|--------------|--------------|-----------------------------------|--------------|--------------|--------------|
|       |              | 1.5 to 10Å   |              | 10 to 50Å    |              | 1.5 to 10Å                        |              | 10 to 50Å    |              |
|       |              | 300K         | 440K         | 300K         | 440K         | 300K                              | 440K         | 300K         | 440K         |
| ~39nm | $Pm\bar{3}m$ | 26.73        | 25.65        | 19.70        | 18.61        | 20.15                             | 18.34        | 12.96        | 12.77        |
|       | $P4mm$       | <b>26.24</b> | <b>25.19</b> | <b>17.76</b> | 18.02        | <b>19.74</b>                      | 17.87        | <b>11.54</b> | 11.89        |
|       | $Amm2$       | 27.96        | 25.77        | 18.07        | <b>17.99</b> | 20.99                             | 18.03        | 11.67        | <b>11.87</b> |
|       | $R3m$        | 26.36        | 25.24        | 19.84        | 21.79        | 19.78                             | <b>17.86</b> | 13.69        | 17.46        |
| ~20nm | $Pm\bar{3}m$ | 20.56        | 18.49        | 14.23        | 12.14        | 19.95                             | 17.61        | 12.63        | 12.35        |
|       | $P4mm$       | <b>20.03</b> | 18.07        | <b>11.37</b> | <b>11.68</b> | <b>19.40</b>                      | 17.35        | <b>10.95</b> | 11.48        |
|       | $Amm2$       | 20.54        | 18.08        | 11.77        | <b>11.68</b> | 19.85                             | 17.21        | 11.13        | <b>11.46</b> |
|       | $R3m$        | 20.19        | <b>18.03</b> | 14.64        | 17.22        | 19.55                             | <b>17.19</b> | 13.33        | 17.18        |
| ~12nm | $Pm\bar{3}m$ | 19.15        | 17.35        | 12.84        | 12.75        | 17.48                             | 16.76        | 11.58        | 11.05        |
|       | $P4mm$       | <b>18.58</b> | 16.95        | 11.86        | 11.79        | <b>16.94</b>                      | 16.50        | 10.29        | 10.09        |
|       | $Amm2$       | <b>18.58</b> | <b>16.89</b> | <b>11.85</b> | <b>11.78</b> | 16.98                             | <b>16.41</b> | <b>10.28</b> | <b>10.06</b> |
|       | $R3m$        | 18.92        | 17.23        | 14.99        | 17.23        | 17.25                             | 16.59        | 14.21        | 18.66        |

Table S2: Atomic displacement parameters (ADP,  $U_{iso}$  (Å<sup>2</sup>)) for Ti atoms of PDF refinements of synchrotron X-ray data over 1.5-10 Å and 10-50 Å ranges using centrosymmetric cubic  $Pm\bar{3}m$ , and non-centrosymmetric (tetragonal  $P4mm$ , orthorhombic  $Amm2$  and rhombohedra  $R3m$ ) space groups at 300 K and 440 K. The lowest ADP values resulting among the four applied models are highlighted in bold text for each specific temperature and range.

|       | SG           | BTnc@OA           |                   |                  |                  | BTnc@BF <sub>4</sub> <sup>-</sup> |                   |                  |                  |
|-------|--------------|-------------------|-------------------|------------------|------------------|-----------------------------------|-------------------|------------------|------------------|
|       |              | 1.5 to 10Å        |                   | 10 to 50Å        |                  | 1.5 to 10Å                        |                   | 10 to 50Å        |                  |
|       |              | 300K              | 440K              | 300K             | 440K             | 300K                              | 440K              | 300K             | 440K             |
| ~39nm | $Pm\bar{3}m$ | 0.0080(4)         | 0.0096(4)         | 0.0082(1)        | 0.0089(1)        | 0.0087(3)                         | 0.0105(3)         | 0.0084(1)        | 0.0093(1)        |
|       | $P4mm$       | <b>0.0056(11)</b> | <b>0.0066(14)</b> | 0.0053(2)        | 0.0045(5)        | <b>0.0062(8)</b>                  | <b>0.0076(10)</b> | 0.0052(1)        | 0.0047(4)        |
|       | $Amm2$       | 0.0099(8)         | 0.0088(17)        | <b>0.0045(2)</b> | <b>0.0044(5)</b> | 0.0100(7)                         | 0.0084(9)         | <b>0.0045(2)</b> | <b>0.0046(4)</b> |
|       | $R3m$        | 0.0078(4)         | 0.0082(11)        | 0.0079(2)        | 0.0078(1)        | 0.0080(6)                         | 0.0084(7)         | 0.0078(1)        | 0.0078(1)        |
| ~20nm | $Pm\bar{3}m$ | 0.0086(3)         | 0.0103(3)         | 0.0090(1)        | 0.0094(1)        | 0.0085(3)                         | 0.0102(3)         | 0.0084(1)        | 0.0093(1)        |
|       | $P4mm$       | <b>0.0059(9)</b>  | <b>0.0067(10)</b> | 0.0060(1)        | 0.0048(4)        | <b>0.0059(8)</b>                  | <b>0.0066(9)</b>  | 0.0053(1)        | 0.0046(4)        |
|       | $Amm2$       | 0.0089(5)         | 0.0073(11)        | <b>0.0048(2)</b> | <b>0.0047(4)</b> | 0.0069(9)                         | 0.0074(12)        | <b>0.0043(2)</b> | <b>0.0046(4)</b> |
|       | $R3m$        | 0.0078(6)         | 0.0092(6)         | 0.0081(1)        | 0.0081(1)        | 0.0082(7)                         | 0.0082(8)         | 0.0079(1)        | 0.0080(1)        |
| ~12nm | $Pm\bar{3}m$ | 0.0097(3)         | 0.0113(3)         | 0.0105(1)        | 0.0116(1)        | 0.0097(3)                         | 0.0111(3)         | 0.0100(1)        | 0.0113(1)        |
|       | $P4mm$       | 0.0066(7)         | 0.0080(10)        | 0.0054(3)        | 0.0055(4)        | <b>0.0072(6)</b>                  | <b>0.0089(8)</b>  | 0.0049(2)        | 0.0053(3)        |
|       | $Amm2$       | <b>0.0066(9)</b>  | <b>0.0067(11)</b> | <b>0.0052(3)</b> | <b>0.0054(4)</b> | 0.0074(7)                         | 0.0090(9)         | <b>0.0047(2)</b> | <b>0.0052(3)</b> |
|       | $R3m$        | 0.0100(6)         | 0.0099(8)         | 0.0076(1)        | 0.0077(1)        | 0.0090(5)                         | 0.0110(4)         | 0.0077(1)        | 0.0075(1)        |
